# Supplementary material for: A simple fluorescent switch with four states based on benzothiazole-spiropyran for reversible multicolor displays and anti-counterfeiting
Source: Royal Society of Chemistry journal article supplement (doi:10.1039/d2nj02647c), 2022-01-01
Supplement: d2nj02647c1.pdf [file d2nj02647c1.pdf]

Supporting information

**A simple fluorescent switch with four states based on benzothiazole-spiropyran  
for reversible multicolor display and anti-counterfeiting**

Danyang Liu <sup>\*a b</sup>

*<sup>a</sup> Institute of Chemical Industry of Forest Products, Chinese Academy of Forestry  
(CAF), Nanjing, 210042, PR China*

*<sup>b</sup> State Key Laboratory of Supramolecular Structure and Materials, College of  
Chemistry, Jilin University, Changchun, 130012, P. R. China  
Email: 15850527485@163.com*

**Table of contents**

1. NMR and LC-HMRS spectra of SP-OX-HBT and its isomers (Figure S1, S2)
2. Absorption spectra of SP-OX-HBT and its isomers in solution (Figure S3-S5)
3. Absorption, emission spectra and corresponding pictures of the solid powder (Figure S6)
4. Illustration of the structure of paper (Figure S7)

1. NMR and LC-HMRS spectra of SP-OX-HBT and its isomers

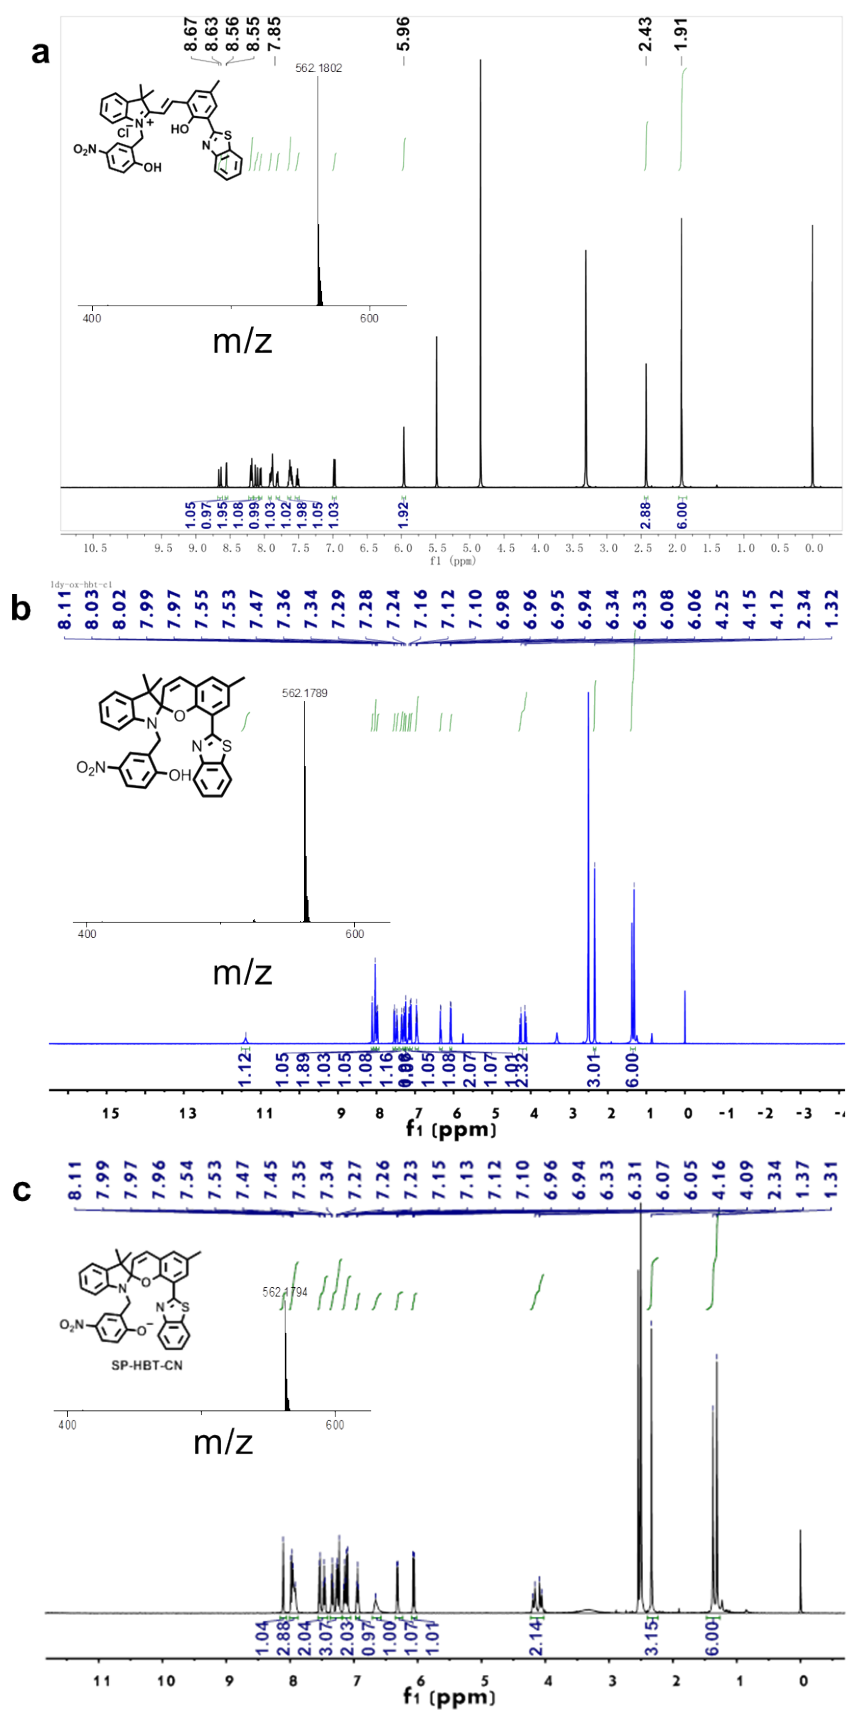

**Figure S1** The  $^1\text{H}$  NMR spectra and LC-HMRS of (a) SP-OX-HBT in  $\text{CD}_3\text{OD}$  (b) SP-OX-HBT

with equivalent base in DMSO and (c) SP-OX-HBT with excess base in DMSO.

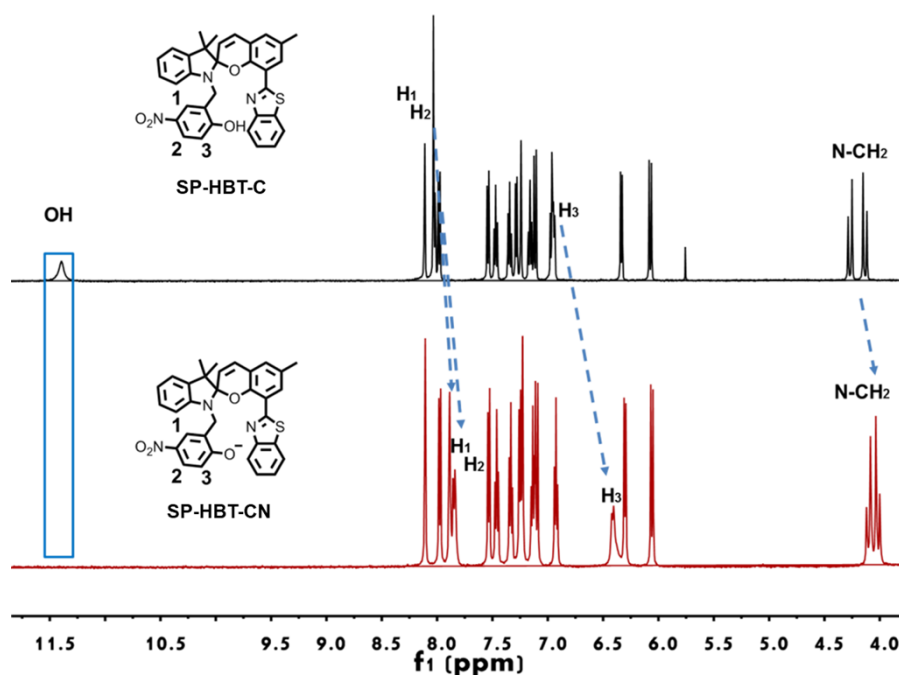

**Figure S2** The partial  $^1\text{H}$  NMR spectra of SP-HBT-C and SP-HBT-CN in DMSO- $d_6$ . It is clearly shown that methylene and hydrogens nearing the non-conjugated nitrophenol are shifted to the high field in  $^1\text{H}$ -NMR spectrum of SP-HBT-CN. At the same time, the disappearance of the OH peak of SP-HBT-CN molecule also indicates the formation of phenol anion.

## 2. Absorption spectra of SP-OX-HBT and its isomers in solution

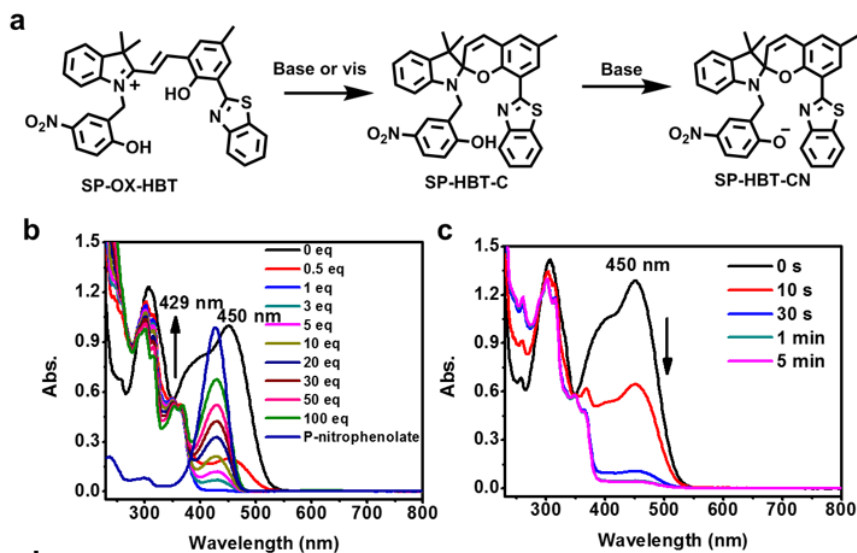

**Figure S3** (a) The transformation of SP-OX-HBT upon base or visible light irradiation. (b) The absorption spectra of SP-OX-HBT with different equivalent base in  $\text{CH}_3\text{CN}$  solution. (c) The absorption spectra of SP-OX-HBT upon visible light irradiation with different time in  $\text{CH}_3\text{CN}$

solution.

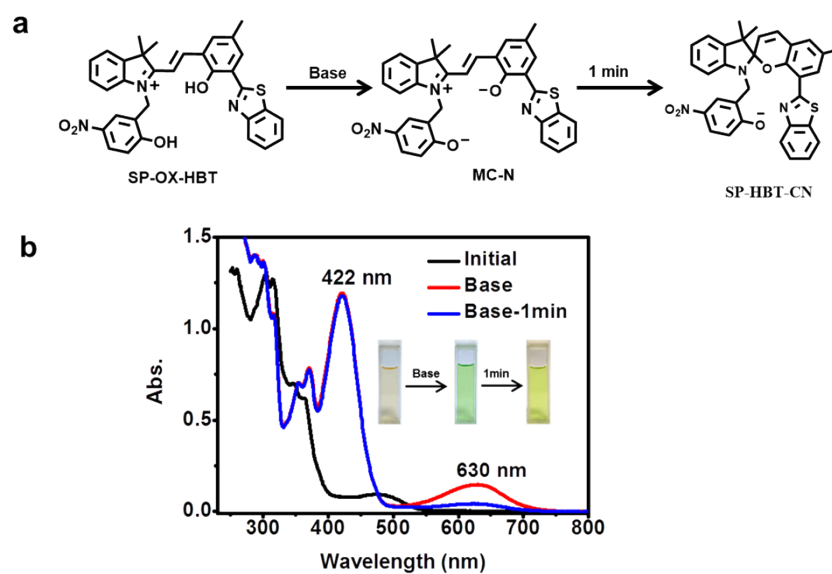

**Figure S4** (a) The transformation of SP-HBT-C stimulated by alkali. (b) UV-Vis absorption spectra of SP-HBT-C without, with addition of *t*-BuONa immediately and equilibrium for 1 min in  $\text{CH}_2\text{Cl}_2$  solution and corresponding photographs.

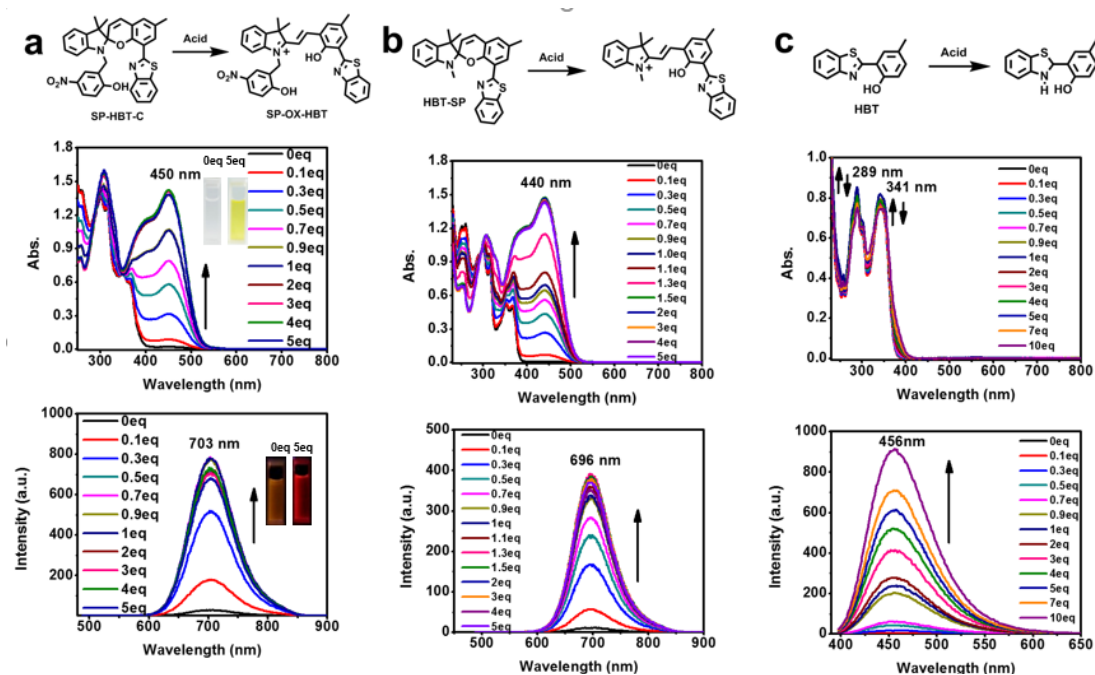

**Figure S5** The structural transformation, UV-Vis absorption spectra and fluorescence spectra of (a)

SP-HBT-C, (b) SP-HBT, (c) HBT with different equivalent methanesulfonic acid in  $\text{CH}_3\text{CN}$  solution.

### 3. Absorption, emission spectra and corresponding pictures of the solid powder

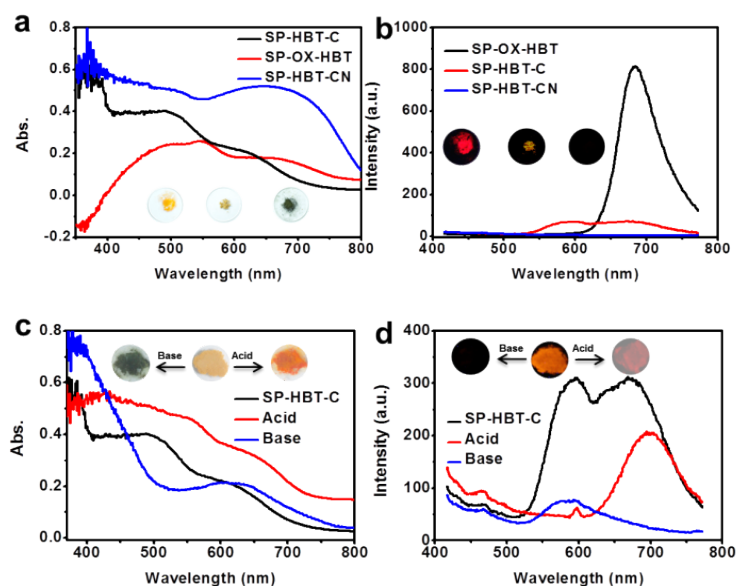

**Figure S6** Pictures of solid powders in various states under visible light and 365 nm UV lamp and their corresponding (a) UV-Vis absorption spectra and (b) fluorescence spectra; (c) the UV-Vis absorption spectra of SP-HBT-C before and after acid/base stimulation; (d) the fluorescence spectra of SP-HBT-C before and after acid/base stimulation.

### 4. Illustration of the structure of paper

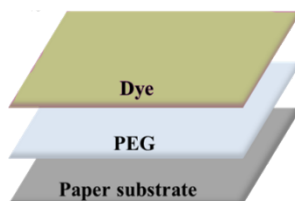

**Figure S7** Illustration of the three-layer structure of rewritable paper based on the SP-HBT-C.
